# Supplementary material for: A Bcl-2 Associated Athanogene (bagA) Modulates Sexual Development and Secondary Metabolism in the Filamentous Fungus Aspergillus nidulans
Source: PubMed Central journal article supplement (PMC6013550; doi:10.3389/fmicb.2018.01316), 2018-06-15
Supplement: Table_1.pdf [file Table_1.pdf]

**Table 1. List of strains used in this study.**

| <b>Strain</b> | <b>Genotype</b>                                               | <b>Source/Reference</b>                                |
|---------------|---------------------------------------------------------------|--------------------------------------------------------|
| RJMP103.5     | Wild-type                                                     | <a href="#">PLoS Genet.</a> 2013 Jan; 9(1): e1003193.  |
| TNO2A7        | <i>nku70::argB, riboB2, pyrG89, pyroA4, veA1</i>              | <a href="#">Genetics.</a> 2006 Mar; 172(3): 1557–1566. |
| RJMP101.19    | <i>pyrG89; veA+</i>                                           | <a href="#">PLoS Genet.</a> 2013 Jan; 9(1): e1003193.  |
| TSJA12.1      | <i>nku70::argB, pyrG::gpdA(p)::bagA; riboB2, pyroA4, veA1</i> | This Study                                             |
| TSJA13.1      | <i>nku70::argB, ΔbagA:: pyrG; riboB2, pyroA4, veA1</i>        | This Study                                             |
| RSJA6.1       | <i>pyrG89; pyrG:: gpdA(p)::bagA</i>                           | This Study                                             |
| RSJA7.1       | <i>pyrG89; ΔbagA:: pyrG</i>                                   | This Study                                             |
| RSJA11.1      | <i>pyrG::gpdA(p)::bagA; ΔppoA::metG</i>                       | This Study                                             |
| RDIT5.8       | <i>pyrG89; argB2; veA1; gpdA(p)::ppoA::trpC</i>               | J Biol Chem. 2004 Mar 19;279(12):11344-53.             |
| RSJA 14.1     | <i>trpC::gpdA(p)::ppoA; ΔbagA::pyrG</i>                       | This Study                                             |
| RSJA 18.1     | <i>pyrG89; bagA::Flag3x:: trpC:: pyrG</i>                     | This Study                                             |

**Table 2. List of Primers used in this study**

| Name                    | Primer                                                                |
|-------------------------|-----------------------------------------------------------------------|
| SJ OE BAG Nid 5'        | agt cgt gca aga aga gga t                                             |
| SJ OEBAG Primer 1       | atggatgagcaatgatggcaac                                                |
| SJ OEBAG Primer 2       | cca att cgc cct ata gtg agt cgt att acg gga ttt ata ata gac cag ccg g |
| SJ OEBAG Primer 3       | cagctaccccgcttgagcagacatcaccatgaccaatctgctcccaca                      |
| SJ OEBAG Primer 4       | caa cgc atc tgg tgt cac aat                                           |
| SJ OEBAG Nid 3' Rev     | gaa gtc gcc gtt gca gct ct                                            |
| SJ KOB Primer 2 Rev     | cga tat caa gct atc gat acc tcg act cgg att tat aat aga cca gcc ggg   |
| SJ KOB Primer 3 For     | gtcgtgcagcctctccgattgtcgaatattaccttaaaccagttaaatt                     |
| SJ Nid Bag int F        | tcctcacgctctgactgggcttc                                               |
| SJ Nid Bag int R        | gtc tcg tcg tcc aca act tea at                                        |
| SJ 5' For Nid BAG EcoRI | aacggaattc atggatgagcaatgatggcaac                                     |
| SJ 3' Rev Nid BAG SpeI  | gagt actagt caacgcactctggtgtcacaat                                    |
| SJ ppoC int F           | actacaacccccgcaacctg                                                  |
| SJ ppoC int R           | tggtcgtagtggcgtgtagg                                                  |
| SJ Nid Bag pyrG Rev     | ggagatcgtcattgcgtgcggaaccgataagataggcgagacc                           |
| SJ Bag 5' For           | ttccgcacgcaatgagcgatctcc                                              |
| SJ Bag Pyro Rev         | ccttcgggcttcatagtggctctgaaacaatatattgggttatgt                         |
| SJ Mut D368 to S        | caagtcatgattaaggcgtcgtccattgaagttgtggac                               |
| SJ ppoA int Nid F       | gccgattcaccaaacctg                                                    |
| SJ ppoA int Nid R       | cggatgagagatacgactg                                                   |

|                  |                                                    |
|------------------|----------------------------------------------------|
| SJ ppoB int F    | acatccagccgagatctcg                                |
| SJ ppoB int R    | cgc atg agg agc ttg tac at                         |
| SJ laeA int F    | tcagcctccgaaccacccgaagaact                         |
| SJ laeA int R    | ctccaggggccagcgatagacacgact                        |
| SJ velB int F    | ttcgctagacagctcattctacg                            |
| SJ velB int R    | tagtattcgttatccagaccatcg                           |
| SJ veA int F     | ggaacgagggctcttatcgg                               |
| SJ veA int R     | tgaagcagaagacatctgattgc                            |
| SJ Bag-Flag Rev  | atcaccgtcatggtctttgtagtcggcctttgccaccgcatcgacctgat |
| SJ 3XFlag For    | gactacaagaccatgacggtgat                            |
| SJ trpC-pyrG For | taagcggccactccacatctccacgagtcgaggtatcgatagcttgatat |
| SJ TrpC term Rev | gtggagatgtggagtgggcgctta                           |
